# Supplementary material for: A peptide CORO1C-47aa encoded by the circular noncoding RNA circ-0000437 functions as a negative regulator in endometrium tumor angiogenesis
Source: PubMed Central journal article supplement — J Biol Chem. 2021 Sep 14;297(5):101182. doi: 10.1016/j.jbc.2021.101182 (PMC8573159; doi:10.1016/j.jbc.2021.101182), 2021-09-14
Supplement: mmc1.pdf [file mmc1.pdf]

Supplementary figure 1

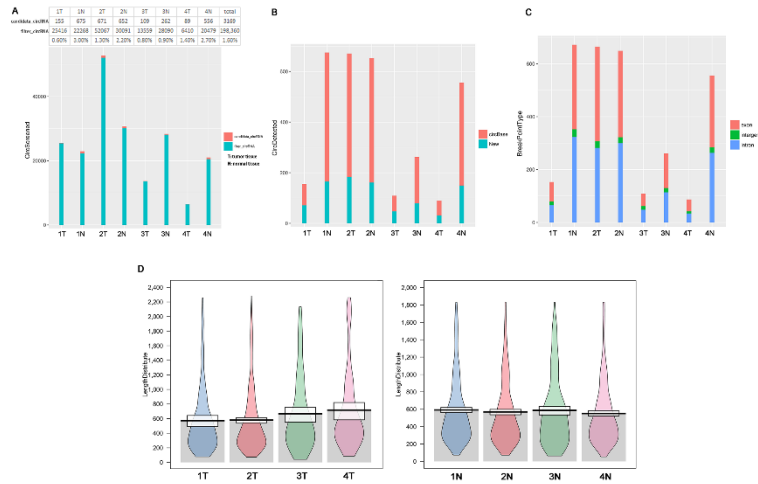

Supplementary figure 2

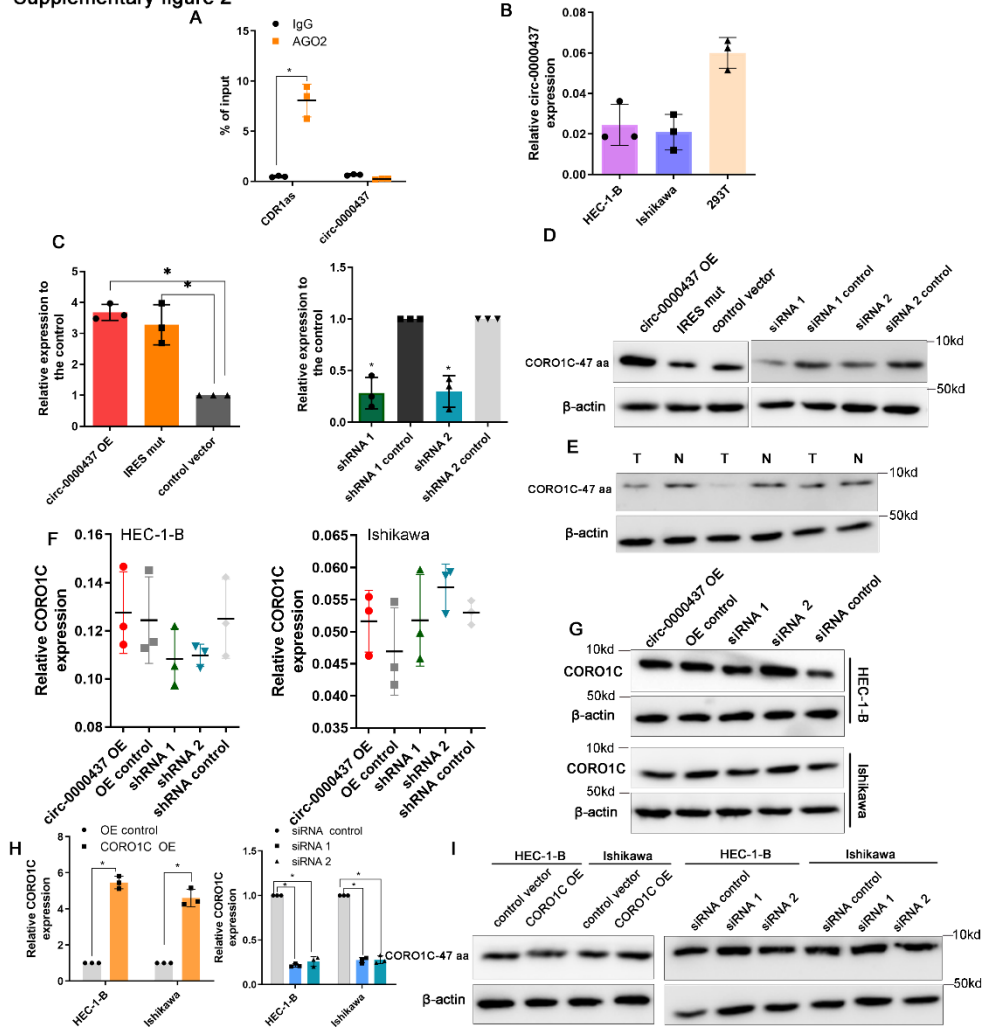

Supplementary figure 3

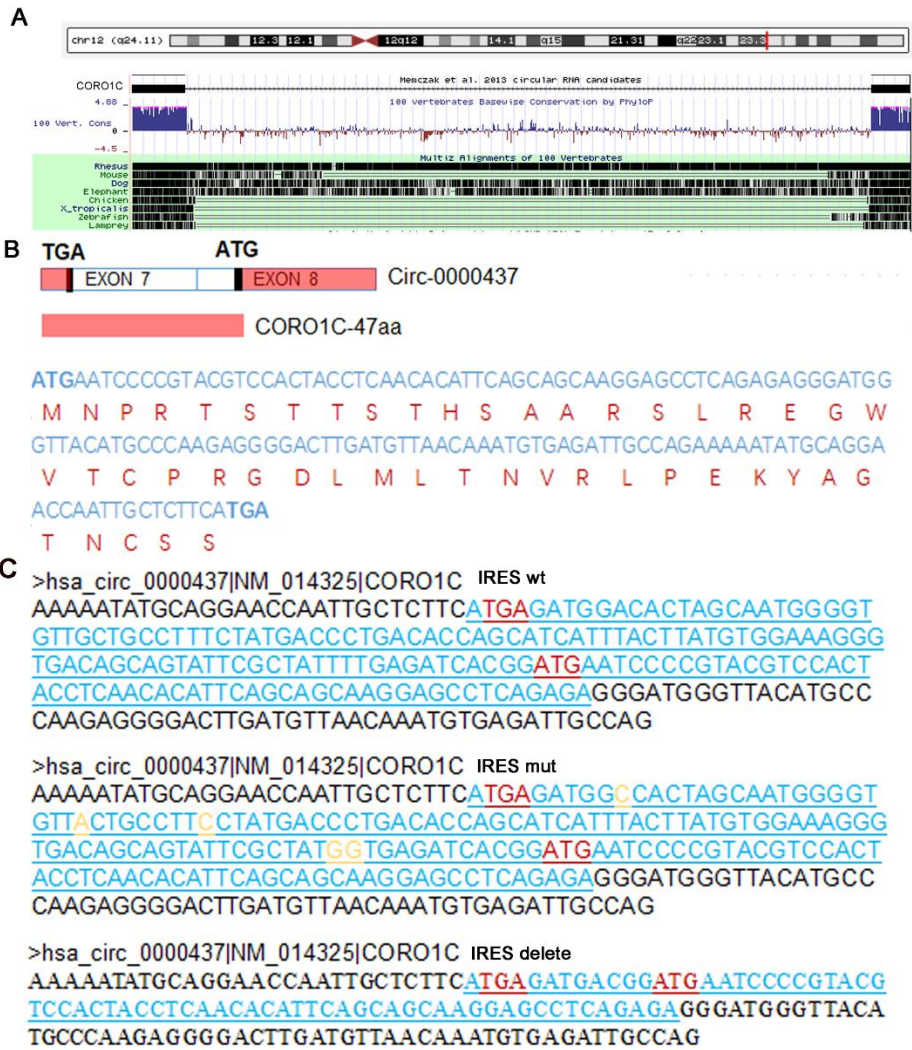

Supplementary figure 4

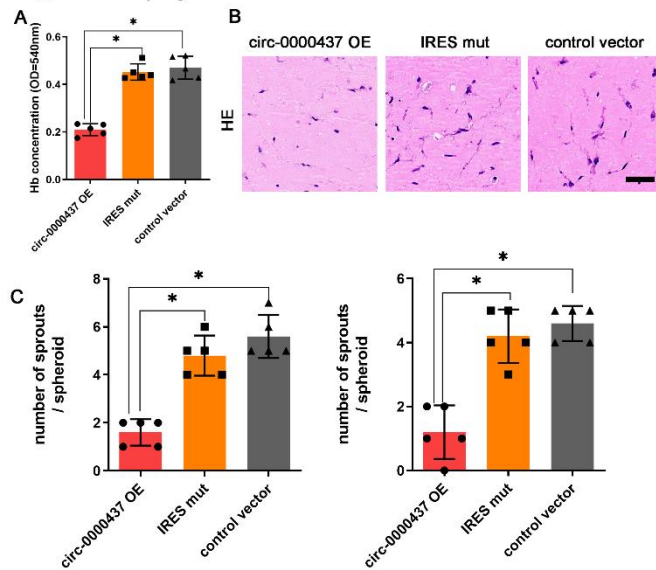

**Supplementary Figure 1- Profiling of circular RNA in human EC and adjacent normal tissues.**

- (A) The proportion of the candidate circRNAs in the filter circRNAs. The filter circRNAs is the identified total circRNAs; the candidate circRNAs is the selected circRNAs according our screening rules (T: tumor tissues; N: normal tissues).
- (B) The proportion of the known circRNAs in sequencing results compared with circBase.
- (C) The distribution of the number of identified circRNAs derived from different genomic regions.
- (D) Length distribution of the identified circRNAs in human EC (left) and adjacent normal tissues (right). y-axis: the length of circRNAs detected in this study.

**Supplementary Figure 2- Expression of *circ-0000437* and *CORO1C-47aa* in cell lines and clinical samples.**

- (A) RIP analysis of *circ-0000437* and *CDR1as* using antibodies against AGO2. The RIP enrichment of the AGO2-associated circular RNAs was measured by RT-qPCR, and each value was normalized to the level of input RNA used in RIP analysis.
- (B) The background expression of *circ-0000437* in EC cell lines and 293T cell. The expression level of circRNAs was analyzed by qRT-PCR and normalized to GAPDH. Data are represented as mean $\pm$ SD from three independent experiments.
- (C) Relative expression levels of *circ-0000437* as determined by qPCR in Ishikawa cells transfected with *circ-0000437* or *circ-0000437*-targeting siRNAs. Results are shown as means  $\pm$  SD relative to vector control.

- (D) The protein level of CORO1C-47aa were detected by western blot in Ishikawa cells transfected with *circ-0000437* or *circ-0000437*-targeting siRNAs.
- (E) The protein level of CORO1C-47aa were detected by western blot in EC tumor tissues and matched normal tissues (T: tumor, N: normal).
- (F) Relative expression levels of *CORO1C* as determined by qPCR in EC cells transfected with *circ-0000437* or *circ-0000437*-targeting siRNAs. Results are shown as means  $\pm$  SD relative to vector control.
- (G) The protein level of CORO1C were detected by western blot in EC cells transfected with *circ-0000437* or *circ-0000437*-targeting siRNAs.
- (H) Relative expression levels of *CORO1C* as determined by qPCR in EC cells transfected with *CORO1C* or *CORO1C*-targeting siRNAs. Results are shown as means  $\pm$  SD relative to vector control.
- (I) The protein level of CORO1C were detected by western blot in EC cells transfected with *CORO1C* or *CORO1C*-targeting siRNAs.

**Supplementary Figure 3- Sequence of CORO1C-47aa and IRES structure of CORO1C-47aa**

- (A) The genomic sequence of *circ-0000437* and conservation analysis of *circ-0000437* exons in different species.
- (B) Schematic diagram of CORO1C-47aa (upper) and the CORO1C-47aa peptides sequence corresponding to the *circ-0000437* nucleotide sequence.
- (C) Putative IRES sequences in *circ-0000437* and Mutated IRES sequences in *circ-0000437* IRES mutation plasmids.

#### **Supplementary Figure 4- Effect of CORO1C-47aa in angiogenesis**

- (A) Matrigel plugs were harvested. Angiogenesis was quantified by measuring haemoglobin concentration in the recovered Matrigel plugs (mean±SD, \*p<0.05).
- (B) Representative photographs of HE-staining in the indicated experimental conditions (Scale bars: 100µm).
- (C) HUVEC spheroids embedded in fibrin gel were incubated with indicated medium. Then, radially growing cell sprouts were counted (mean±SD, \*p<0.05).

**Supplemental table 1. Clinicopathological characteristics of endometrial cancer patients in Chinese population.**

| Characteristics                 | Beijing population |        | Suzhou population |        | Overall        |        |
|---------------------------------|--------------------|--------|-------------------|--------|----------------|--------|
|                                 | N <sup>a</sup>     | (%)    | N <sup>a</sup>    | (%)    | N <sup>a</sup> | (%)    |
| <b>Age (years)</b>              |                    |        |                   |        |                |        |
| ≤65                             | 41                 | (43.6) | 53                | (51.0) | 94             | (47.5) |
| >65                             | 53                 | (56.4) | 51                | (49.0) | 104            | (52.5) |
| <b>Age at menarche (years)</b>  |                    |        |                   |        |                |        |
| ≤11                             | 4                  | (4.3)  | 7                 | (6.7)  | 11             | (5.6)  |
| 11-16                           | 71                 | (75.5) | 67                | (64.4) | 138            | (69.7) |
| ≥16                             | 19                 | (20.2) | 30                | (28.8) | 49             | (24.7) |
| <b>Menopausal status</b>        |                    |        |                   |        |                |        |
| Premenopausal                   | 22                 | (23.4) | 32                | (30.8) | 54             | (27.3) |
| Postmenopausal                  | 72                 | (76.6) | 72                | (69.2) | 144            | (71.7) |
| <b>Family history of cancer</b> |                    |        |                   |        |                |        |
| Positive                        | 15                 | (16.0) | 8                 | (7.7)  | 23             | (11.6) |
| Negative                        | 79                 | (84.0) | 96                | (92.3) | 175            | (88.4) |
| <b>BMI<sup>b</sup></b>          |                    |        |                   |        |                |        |
| ≤25                             | 39                 | (41.5) | 41                | (39.4) | 80             | (40.4) |
| >25                             | 55                 | (58.5) | 63                | (60.6) | 118            | (59.6) |
| <b>FIGO<sup>c</sup> stage</b>   |                    |        |                   |        |                |        |
| I                               | 67                 | (71.3) | 79                | (76.0) | 146            | (73.7) |
| II                              | 14                 | (14.9) | 7                 | (6.7)  | 21             | (10.6) |
| III                             | 13                 | (13.8) | 18                | (17.3) | 31             | (15.7) |
| <b>Histologic type</b>          |                    |        |                   |        |                |        |
| Endometrioid                    | 74                 | (78.7) | 91                | (87.5) | 165            | (83.3) |
| Non-endometrioid                | 20                 | (21.3) | 13                | (12.5) | 33             | (16.7) |
| <b>Grade</b>                    |                    |        |                   |        |                |        |
| G1                              | 25                 | (26.6) | 44                | (42.3) | 69             | (34.8) |
| G2                              | 57                 | (60.6) | 53                | (51.0) | 110            | (55.6) |
| G3                              | 12                 | (12.8) | 7                 | (6.7)  | 19             | (9.6)  |

<sup>a</sup>N, Number of patients

<sup>b</sup>BMI, Body mass index.

<sup>c</sup>FIGO, The International Federation of Gynecology and Obstetrics.

**Supplementary Table 2. Oligonucleotides used in PCRs**

---

**PCR**

|                         |         |                               |
|-------------------------|---------|-------------------------------|
| <i>Hsa-circ-0000437</i> | Forward | 5'-GGTGACAGCAGTATTCGCTATTT-3' |
|                         | Reverse | 5'-TGGTTCCTGCATATTTTTCTGG-3'  |
| <i>CORO1C</i>           | Forward | 5'-AAGAGGGTAGAGCAGGAGCTTT-3'  |
|                         | Reverse | 5'-CAGCAGCTCGAATTTCTTCC-3'    |
| Linear <i>CORO1C</i>    | Forward | 5'-CAGGAACCAATTGCTCTTCAT-3'   |
|                         | Reverse | 5'-TTAACATCAAGTCCCCTCTTGG-3'  |
| ARNT                    | Forward | 5'-GCTACCCAGGCTACTGCTAAGA-3'  |
|                         | Reverse | 5'-CGATTGGTGAGACTAGGGTAGG-3'  |
| TACC3                   | Forward | 5'-CACAGACGCACAGGATTCTAAG-3'  |
|                         | Reverse | 5'-TAGTTTTGGCATCCACTTCCTT-3'  |
| VEGFA                   | Forward | 5'-ATGAGCTTCCTACAGCACAACA-3'  |
|                         | Reverse | 5'-ACGTACACGCTCCAGGACTTAT-3'  |
| CD31                    | Forward | 5'-GACCAAGGTGAAAGACTGAACC-3'  |
|                         | Reverse | 5'-TGCAGATATACGTCCCCTGTC-3'   |
| circHIPK3               | Forward | 5'-TCGGCCAGTCATGTATCAAA-3'    |
|                         | Reverse | 5'-ACCAAGACTTGTGAGGCCAT-3'    |
| <i>GAPDH</i> cDNA       | Forward | 5'-GAAGGTGAAGTTCGGAGTC-3'     |
|                         | Reverse | 5'-GAAGATGGTGATGGGATTTCC-3'   |

**siRNA**

|                                |                                |
|--------------------------------|--------------------------------|
| <i>Hsa-circ-0000437</i> siRNA1 | 5'-ATGTGAGATTGCCAGAAAA-3'      |
| <i>Hsa-circ-0000437</i> siRNA2 | 5'-CCAGAAAAATATGCAGGAA-3'      |
| <i>Hsa-circ-0000437</i> siRNA3 | 5'-GAGATTGCCAGAAAAATAT-3'      |
| ARNT siRNA 1                   | 5'-GAGAAGTCAGATGGTTTATTTCTC-3' |
| ARNT siRNA 2                   | 5'-GAGAAATAAACCATCTGACTTCTC-3' |

**Northernblot**

|                         |         |                               |
|-------------------------|---------|-------------------------------|
| <i>Hsa-circ-0000437</i> | Forward | 5'-GGTGACAGCAGTATTCGCTATTT-3' |
|                         | Reverse | 5'-TGGTTCCTGCATATTTTTCTGG-3'  |

**CHIP**

|          |         |                              |
|----------|---------|------------------------------|
| C1-VEGFA | Forward | 5'-GAGCGTTTTGGTTAAATTGAGG-3' |
|          | Reverse | 5'-GAAGAGTGGGACCAGTCAGTCT-3' |
| C2-VEGFA | Forward | 5'-GGTAGGTTTGAATCATCACG-3'   |
|          | Reverse | 5'-CACGTATGCACTGTGGAGTCTG-3' |
| C3-VEGFA | Forward | 5'-GCCAGACTCCACAGTGCATAC-3'  |
|          | Reverse | 5'-GTCCTTTGGGAAGTGTCCAG-3'   |
| C4-VEGFA | Forward | 5'-ATTCCTAGCAAAGAGGGAACG-3'  |
|          | Reverse | 5'-GTTACAGCCTGAAAATTACCC-3'  |

---
